# Supplementary material for: Integrated routine workflow using next-generation sequencing and a fully-automated platform for the detection of KRAS, NRAS and BRAF mutations in formalin-fixed paraffin embedded samples with poor DNA quality in patients with colorectal carcinoma
Source: PubMed Central journal article supplement (PMC6392303; doi:10.1371/journal.pone.0212801), 2019-02-27
Supplement: pone.0212801.s001.pdf [file pone.0212801.s001.pdf]

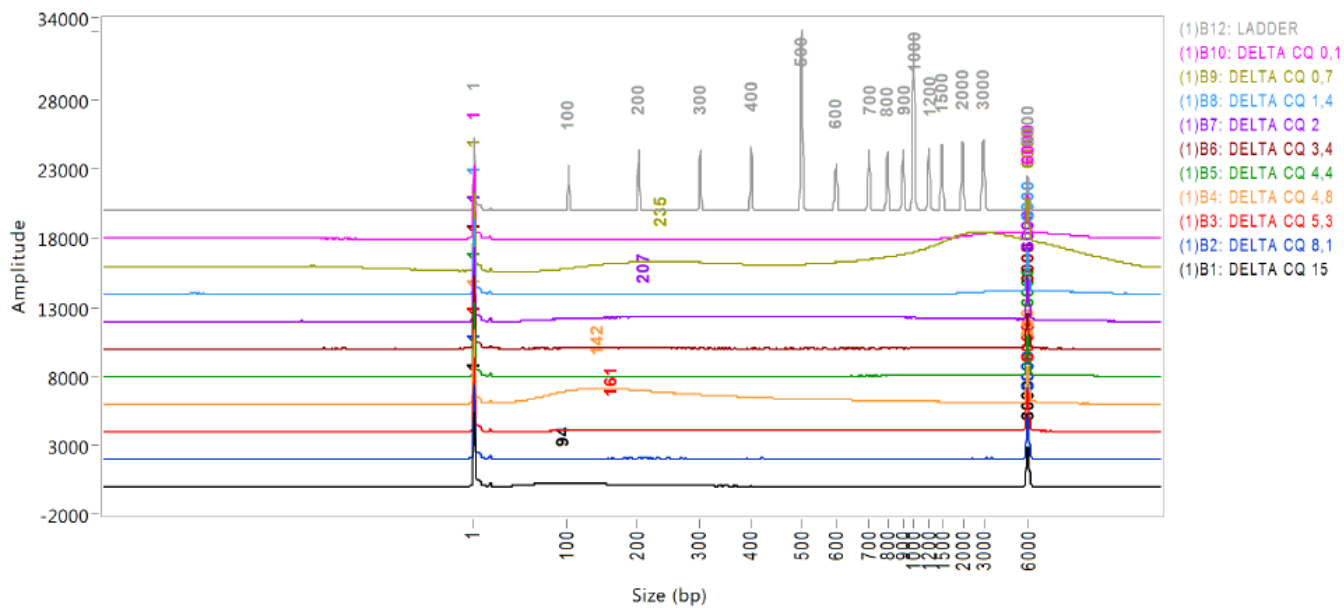

**Figure S1:** DNA Fragmentation profiles (Fragment analyzer) for samples with a range of  $\Delta QC$  between 0.1 and 15. The size of DNA fragments decreases when  $\Delta QC$  increases.
